# Supplementary material for: Sandwich-type tetrakis(phthalocyaninato) rare earth(iii)–cadmium(ii) quadruple-deckers. The effect of f-electrons
Source: Royal Society of Chemistry journal article supplement (doi:10.1039/c2dt32125d), 2012-10-10
Supplement: c2dt32125d.pdf [file c2dt32125d.pdf]

## Supporting Information

**Sandwich-type Tetrakis(phthalocyaninato) Rare Earth(III)-Cadmium(II)**

**Quadruple-deckers. The Effect of f-Electrons**

Hong Shang, Hailong Wang, Kang Wang, Jinglan Kan, Wei Cao, and Jianzhuang

Jiang\*

## Caption of Content

**Figure S1.** Yield of the quadruple-decker compounds **1-12** as a function of the rare earth ionic radius  $M^{III}$ .

**Figure S2.** IR spectra of  $\{[Pc(OC_8H_{17})_8]Eu[Pc(OC_8H_{17})_8]Cd[Pc(OC_8H_{17})_8]Eu[Pc(OC_8H_{17})_8]\}$  (**5**) in the region of 400-4000  $cm^{-1}$  with 2  $cm^{-1}$  resolution.

**Figure S3.** Cyclic voltammetry of  $\{[Pc(OC_8H_{17})_8]Tb-[Pc(OC_8H_{17})_8]Cd-[Pc(OC_8H_{17})_8]Tb[Pc(OC_8H_{17})_8]\}$  (**7**) in  $CH_2Cl_2$  containing 0.1 M  $[NBu_4][ClO_4]$  at scan rate of 40 mV/s.

**Table S1.** Mass spectroscopic and elemental analysis data for the compounds **1-12**.

**Table S2.**  $^1H$  NMR data ( $\delta$ ) and corresponding assignments for the compounds **1-12** in  $CDCl_3$ .

**Table S3.** Electronic absorption data for the compounds **1-12** in toluene.

**Table S4.** Half-wave redox potentials of the compounds **1-12** (V vs SCE) in  $CH_2Cl_2$  containing 0.1 M TBAP.

**Table S5.** The effective imaginary third order molecular hyperpolarizability  $Im\{\chi^{(3)}\}$  value of the compounds **1-12** in toluene solution under an open-aperture configuration.

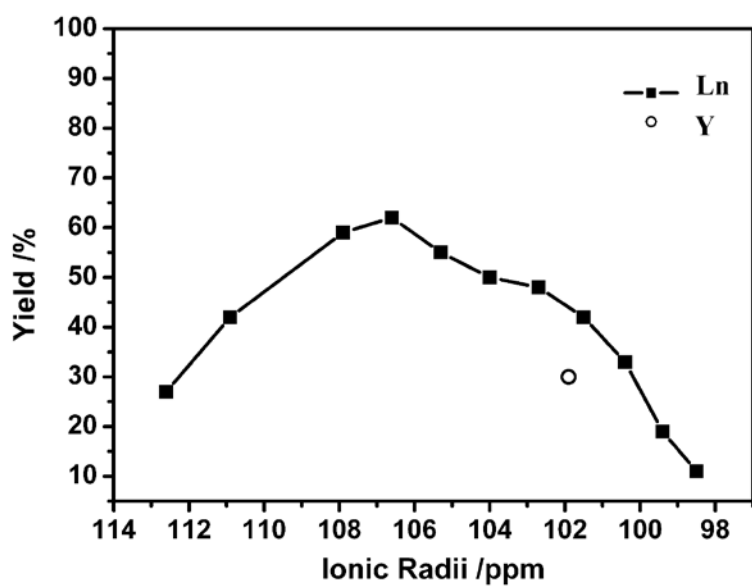

**Figure S1.** Yield of the quadruple-decker compounds **1-12** as a function of the rare earth ionic radius  $M^{III}$ .

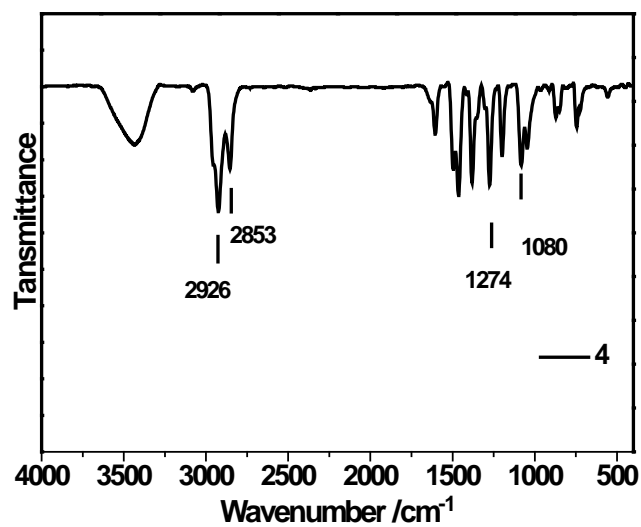

**Figure S2.** IR spectrum of  $\{[\text{Pc}(\text{OC}_8\text{H}_{17})_8]_{\text{Eu}}[\text{Pc}(\text{OC}_8\text{H}_{17})_8]_{\text{Cd}}[\text{Pc}(\text{OC}_8\text{H}_{17})_8]_{\text{Eu}}[\text{Pc}(\text{OC}_8\text{H}_{17})_8]\}$  (**5**) in the region of 400-4000 $\text{cm}^{-1}$  with 2 $\text{cm}^{-1}$  resolution.

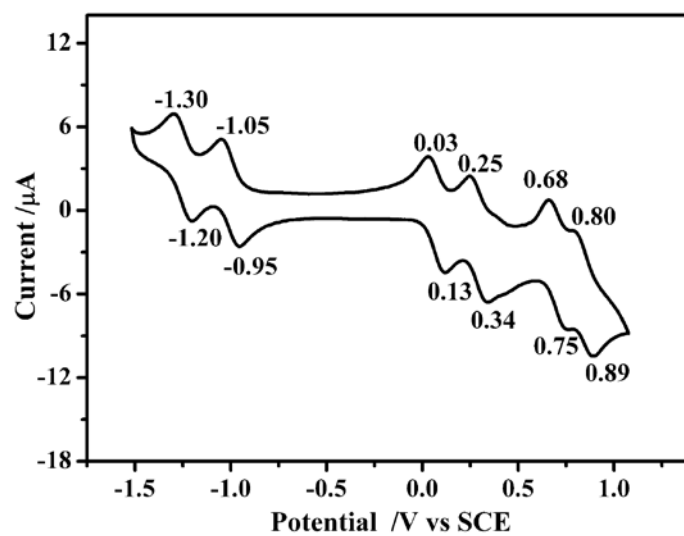

**Figure S3.** Cyclic voltammetry of  $\{[\text{Pc}(\text{OC}_8\text{H}_{17})_8]\text{Tb}[\text{Pc}(\text{OC}_8\text{H}_{17})_8]\text{Cd}[\text{Pc}(\text{OC}_8\text{H}_{17})_8]\text{Tb}[\text{Pc}(\text{OC}_8\text{H}_{17})_8]\}$  (7) in  $\text{CH}_2\text{Cl}_2$  containing 0.1 M  $[\text{NBu}_4][\text{ClO}_4]$  at scan rate of 40 mV/s.

**Table S1.** Mass spectroscopic and elemental analysis data for the compounds **1-12**.<sup>a</sup>

| Compound                                                                                                       | Yield (%) | M <sup>+</sup> ( <i>m/z</i> ) <sup>b</sup> | Analysis (%) <sup>[a,b]</sup> |             |             |
|----------------------------------------------------------------------------------------------------------------|-----------|--------------------------------------------|-------------------------------|-------------|-------------|
|                                                                                                                |           |                                            | C                             | H           | N           |
| C <sub>384</sub> H <sub>576</sub> CdN <sub>32</sub> O <sub>32</sub> Y <sub>2</sub> ( <b>1</b> ) <sup>c</sup>   | 30        | 6441.5 (6441.2)                            | 70.46 (71.58)                 | 8.86 (9.01) | 6.83 (6.96) |
| C <sub>384</sub> H <sub>576</sub> CdN <sub>32</sub> O <sub>32</sub> Pr <sub>2</sub> ( <b>2</b> ) <sup>d</sup>  | 27        | 6545.3 (6545.2)                            | 70.25 (70.45)                 | 8.87 (8.87) | 6.83 (6.85) |
| C <sub>384</sub> H <sub>576</sub> CdN <sub>32</sub> O <sub>32</sub> Nd <sub>2</sub> ( <b>3</b> ) <sup>c</sup>  | 42        | 6547.1 (6547.2)                            | 69.29 (70.37)                 | 8.72 (8.86) | 6.72 (6.84) |
| C <sub>384</sub> H <sub>576</sub> CdN <sub>32</sub> O <sub>32</sub> Sm <sub>2</sub> ( <b>4</b> )               | 59        | 6567.9 (6567.2)                            | 70.24 (70.24)                 | 8.84 (8.84) | 6.83 (6.83) |
| C <sub>384</sub> H <sub>576</sub> CdN <sub>32</sub> O <sub>32</sub> Eu <sub>2</sub> ( <b>5</b> ) <sup>c</sup>  | 62        | 6569.0 (6569.2)                            | 69.13 (70.21)                 | 8.70 (8.82) | 6.70 (6.82) |
| C <sub>384</sub> H <sub>576</sub> CdN <sub>32</sub> O <sub>32</sub> Gd <sub>2</sub> ( <b>6</b> ) <sup>d</sup>  | 55        | 6578.9 (6579.2)                            | 69.90 (70.10)                 | 8.83 (8.82) | 6.79 (6.81) |
| C <sub>384</sub> H <sub>576</sub> CdN <sub>32</sub> O <sub>32</sub> Tb <sub>2</sub> ( <b>7</b> ) <sup>d</sup>  | 50        | 6581.4 (6581.2)                            | 69.87 (70.06)                 | 8.83 (8.82) | 6.79 (6.81) |
| C <sub>384</sub> H <sub>576</sub> CdN <sub>32</sub> O <sub>32</sub> Dy <sub>2</sub> ( <b>8</b> )               | 48        | 6590.7 (6591.2)                            | 69.68 (69.98)                 | 8.85 (8.81) | 6.70 (6.80) |
| C <sub>384</sub> H <sub>576</sub> CdN <sub>32</sub> O <sub>32</sub> Ho <sub>2</sub> ( <b>9</b> ) <sup>c</sup>  | 42        | 6593.6 (6593.2)                            | 68.87 (69.93)                 | 8.67 (8.80) | 6.68 (6.80) |
| C <sub>384</sub> H <sub>576</sub> CdN <sub>32</sub> O <sub>32</sub> Er <sub>2</sub> ( <b>10</b> ) <sup>e</sup> | 33        | 6595.1 (6595.2)                            | 69.50 (69.88)                 | 8.41 (8.80) | 6.85 (6.79) |
| C <sub>384</sub> H <sub>576</sub> CdN <sub>32</sub> O <sub>32</sub> Tm <sub>2</sub> ( <b>11</b> ) <sup>c</sup> | 19        | 6600.9 (6601.2)                            | 69.47 (69.85)                 | 8.81 (8.79) | 6.75 (6.79) |
| C <sub>384</sub> H <sub>576</sub> CdN <sub>32</sub> O <sub>32</sub> Yb <sub>2</sub> ( <b>12</b> ) <sup>d</sup> | 11        | 6611.0 (6611.2)                            | 69.57 (69.76)                 | 8.79 (8.78) | 6.76 (6.78) |

<sup>a</sup> Calculated values given in parentheses. <sup>b</sup> By MALDI-TOF mass spectrometry. The value corresponds to the most abundant isotopic peak of the protonated molecular ion M<sup>+</sup>. <sup>c</sup> Contain 1.0 equiv. of solvated CHCl<sub>3</sub>. <sup>d</sup> Contain 1.0 equiv. of solvated H<sub>2</sub>O. <sup>e</sup> Contain 2.0 equiv. of solvated H<sub>2</sub>O.

**Table S2.**  $^1\text{H}$  NMR data ( $\delta$ ) and assignments of the quadruple complexes in  $\text{CDCl}_3$ .

| Complex  | location | $\text{H}^a$   | $-\text{OCH}_2-$                                | $-\text{OCH}_2(\text{CH}_2)_6-$                                                                      | $-\text{OCH}_2(\text{CH}_2)_6\text{CH}_3$ |
|----------|----------|----------------|-------------------------------------------------|------------------------------------------------------------------------------------------------------|-------------------------------------------|
| <b>1</b> | outer    | 9.47 (s, 16H)  | 3.33 (m, 32H)                                   |                                                                                                      | 0.87 (t, 48H)                             |
|          | inner    | 10.12 (s, 16H) | 4.88 (m, 16H)<br>3.92 (m, 16H)                  | 2.69-1.23 (m,<br>384H)                                                                               | 0.87 (t, 48H)                             |
| <b>2</b> | outer    | 4.39 (s, 16H)  | 2.81 (m, 16H)                                   |                                                                                                      | 0.75 (t, 48H)                             |
|          | inner    | 5.49 (s, 16H)  | 2.62 (m, 16H)<br>3.48 (m, 16H)<br>3.20 (m, 16H) | 1.51-0.93 (m,<br>384H)                                                                               | 0.83 (t, 48H)                             |
| <b>3</b> | outer    | 6.79 (s, 16H)  | 3.97 (m, 32H)                                   | 1.87 (m, 32H)<br>1.85 (m, 32H)<br>1.49 (m, 64H)<br>1.33 (m, 64H)                                     | 0.91 (t, 48H)                             |
|          | inner    | 7.12 (s, 16H)  | 4.15 (m, 32H)                                   | 2.17 (m, 32H)<br>1.85 (m, 32H)<br>1.61 (m, 64H)<br>1.38 (m, 64H)                                     | 1.03 (t, 48H)                             |
| <b>4</b> | outer    | 8.78 (s, 16H)  | 5.09 (m, 16H)<br>4.48 (m, 16H)                  | 2.38 (m, 32H)<br>2.02 (m, 32H)<br>1.89 (m, 64H)<br>1.49 (m, 64H)                                     | 0.97 (t, 48H)                             |
|          | inner    | 9.37 (s, 16H)  | 5.68 (m, 32H)                                   | 3.24 (m, 32H)<br>2.82 (m, 32H)<br>2.38 (m, 32H)<br>2.30 (m, 32H)<br>2.02 (m, 32H)<br>1.62 (m, 32H)   | 1.32 (t, 48H)                             |
| <b>5</b> |          |                | Not observed                                    |                                                                                                      |                                           |
| <b>6</b> | outer    | -50.39(s, 16H) | -31.33 (m,32H)                                  | -14.78(m,64H)<br>-13.49(m,32H)<br>-12.16(m,32H)<br>-9.88 (m, 32H)<br>-4.83 (m, 32H)                  | -1.90 (t, 48H)                            |
|          | inner    | -52.04(s, 16H) | -33.78(m, 32H)                                  | -22.07(m,32H)<br>-18.90(m, 2H)<br>-14.78(m,32H)<br>-12.16(m,32H)<br>-9.88 (m, 32H)<br>-4.83 (m, 32H) | -2.88 (t, 48H)                            |

|           |       |                |                |                     |                |
|-----------|-------|----------------|----------------|---------------------|----------------|
| <b>7</b>  | outer | -23.18(s, 16H) | -14.74(m, 32H) | -12.42(m,32H)       | -0.67 (t, 48H) |
|           |       |                |                | -10.20(m,32H)       |                |
|           |       |                |                | -6.61 (m, 32H)      |                |
|           |       |                |                | -5.31 (m, 32H)      |                |
|           |       |                |                | -4.12 (m, 32H)      |                |
|           |       |                |                | -2.25 (m, 32H)      |                |
|           |       |                |                | -2.25 (m, 32H)      |                |
|           | inner | -24.18(s, 16H) | -15.84(m, 32H) | -15.84(m,32H)       | -1.59 (t, 48H) |
|           |       |                |                | -10.20(m,32H)       |                |
|           |       |                |                | -8.64 (m, 32H)      |                |
|           |       |                |                | -6.61 (m, 32H)      |                |
|           |       |                |                | -5.77 (m, 32H)      |                |
|           |       |                |                | -2.25 (m, 32H)      |                |
|           |       |                |                | -2.25 (m, 32H)      |                |
| <b>8</b>  | outer | -5.32 (s, 16H) | -4.12 (m, 32H) | -0.92 (m, 32H)      | 1.20 (t, 48H)  |
|           |       |                |                | -0.83 (m, 32H)      |                |
|           |       |                |                | -0.09 (m, 32H)      |                |
|           |       |                |                | 0.32 (m, 32H)       |                |
|           |       |                |                | 0.58 (m, 64H)       |                |
|           |       |                |                | 0.58 (m, 64H)       |                |
|           |       |                |                | 0.32 (m, 32H)       |                |
|           | inner | -6.02 (s, 16H) | -4.29 (m, 32H) | -2.62 (m, 32H)      | 0.78 (t, 48H)  |
|           |       |                |                | -2.10 (m, 32H)      |                |
|           |       |                |                | -1.42 (m, 32H)      |                |
|           |       |                |                | -0.92 (m, 32H)      |                |
|           |       |                |                | -0.47 (m, 32H)      |                |
|           |       |                |                | -0.47 (m, 32H)      |                |
|           |       |                |                | 0.32 (m, 32H)       |                |
| <b>9</b>  | outer | 7.55 (s, 16H)  | 4.41 (m, 16H)  | 2.50-1.31 (m, 384H) | 0.98 (t, 48H)  |
|           |       |                | 4.08 (m, 16H)  |                     |                |
|           | inner | 7.66 (s, 16H)  | 4.66 (m, 32H)  |                     | 1.13 (t, 48H)  |
|           |       |                |                |                     |                |
| <b>10</b> | outer | 8.17 (s, 16H)  | 5.88 (m, 32H)  | 5.77 (m, 64H)       | 1.42 (t, 48H)  |
|           |       |                |                | 3.30 (m, 32H)       |                |
|           |       |                |                | 2.97 (m, 32H)       |                |
|           |       |                |                | 2.30 (m, 32H)       |                |
|           |       |                |                | 2.07 (m, 32H)       |                |
|           |       |                |                | 2.07 (m, 32H)       |                |
|           |       |                |                | 2.07 (m, 32H)       |                |
|           | inner | 12.59 (s, 16H) | 11.35 (m, 32H) | -22.07(m,32H)       | 3.88 (t, 48H)  |
|           |       |                |                | -18.90(m,32H)       |                |
|           |       |                |                | -14.78(m,32H)       |                |
|           |       |                |                | -12.16(m,32H)       |                |
|           |       |                |                | -9.88 (m, 32H)      |                |
|           |       |                |                | -4.83 (m, 32H)      |                |
|           |       |                |                | -4.83 (m, 32H)      |                |
| <b>11</b> | outer | 27.23 (s, 16H) | 14.32 (m, 16H) | 6.60 (m, 32H)       | 1.48 (t, 48H)  |
|           |       |                | 9.09 (m, 16H)  | 5.77 (m, 32H)       |                |
|           |       |                |                | 4.98 (m, 32H)       |                |
|           |       |                |                |                     |                |



|           |       |                |                |                |               |
|-----------|-------|----------------|----------------|----------------|---------------|
|           |       |                |                | 3.79 (m, 32H)  |               |
|           |       |                |                | 3.13 (m, 32H)  |               |
|           |       |                |                | 2.54 (m, 32H)  |               |
|           | inner | 34.75 (s, 16H) | 21.55 (m, 16H) | 13.44 (m, 32H) | 2.03 (t, 48H) |
|           |       |                | 21.18 (m, 16H) | 12.25 (m, 32H) |               |
|           |       |                |                | 9.10 (m, 32H)  |               |
|           |       |                |                | 8.02 (m, 32H)  |               |
|           |       |                |                | 6.60 (m, 32H)  |               |
|           |       |                |                | 5.09 (m, 32H)  |               |
| <b>12</b> | outer | 10.14 (s, 16H) | 5.63 (m, 16H)  | 2.52 (m, 64H)  | 0.99 (t, 48H) |
|           |       |                | 4.70 (m, 16H)  | 2.27 (m, 32H)  |               |
|           |       |                |                | 2.08 (m, 64H)  |               |
|           |       |                |                | 1.70 (m, 32H)  |               |
|           | inner | 10.72 (s, 16H) | 6.66 (m, 16H)  | 3.79 (m, 32H)  | 1.44 (t, 48H) |
|           |       |                | 6.62 (m, 16H)  | 3.33 (m, 32H)  |               |
|           |       |                |                | 2.70 (m, 64H)  |               |
|           |       |                |                | 2.27 (m, 32H)  |               |
|           |       |                |                | 1.70 (m, 32H)  |               |

**Table S3.** Electronic absorption data for the compounds **1-12** in toluene.

| Compound  | $\lambda_{\text{max}}/\text{nm}$ ( $\log \epsilon$ ) |            |            |            |
|-----------|------------------------------------------------------|------------|------------|------------|
| <b>1</b>  | 355 (5.55)                                           | 576 (4.66) | 629 (5.60) | 704 (4.85) |
| <b>2</b>  | 354 (5.58)                                           | 579 (4.88) | 635 (5.55) | 693 (4.82) |
| <b>3</b>  | 355 (5.48)                                           | 580 (4.64) | 634 (5.64) | 696 (4.79) |
| <b>4</b>  | 355 (5.51)                                           | 580 (4.61) | 632 (5.63) | 698 (4.81) |
| <b>5</b>  | 355 (5.48)                                           | 579 (4.65) | 631 (5.58) | 699 (4.81) |
| <b>6</b>  | 355 (5.47)                                           | 578 (4.56) | 631 (5.58) | 701 (4.76) |
| <b>7</b>  | 355 (5.53)                                           | 578 (4.63) | 629 (5.65) | 705 (4.81) |
| <b>8</b>  | 355 (5.46)                                           | 577 (4.53) | 629 (5.58) | 705 (4.75) |
| <b>9</b>  | 356 (5.49)                                           | 579 (4.59) | 629 (5.59) | 710 (4.77) |
| <b>10</b> | 356 (5.46)                                           | 577 (4.55) | 628 (5.57) | 715 (4.75) |
| <b>11</b> | 356 (5.54)                                           | 577 (4.65) | 628 (5.63) | 713 (4.82) |
| <b>12</b> | 355 (5.51)                                           | 575 (4.62) | 627 (5.59) | 717 (4.81) |

**Table S4.** Half-wave redox potentials of the compounds **1-12** (V vs SCE) in CH<sub>2</sub>Cl<sub>2</sub> containing 0.1 M TBAP.

| Compound  | Oxd <sub>4</sub> | Oxd <sub>3</sub> | Oxd <sub>2</sub> | Oxd <sub>1</sub> | Red <sub>1</sub> | Red <sub>2</sub> | $\Delta E_{1/2}^{\circ}$ <sup>[a]</sup> |
|-----------|------------------|------------------|------------------|------------------|------------------|------------------|-----------------------------------------|
| <b>1</b>  | +0.98            | +0.82            | +0.40            | +0.19            | -0.84            | -1.18            | 1.03                                    |
| <b>2</b>  | +0.91            | +0.73            | +0.50            | +0.20            | -0.97            | -1.25            | 1.17                                    |
| <b>3</b>  | +0.95            | +0.76            | +0.49            | +0.22            | -0.94            | -1.24            | 1.16                                    |
| <b>4</b>  | +0.94            | +0.79            | +0.43            | +0.19            | -0.95            | -1.22            | 1.14                                    |
| <b>5</b>  | +0.94            | +0.80            | +0.41            | +0.18            | -0.95            | -1.21            | 1.13                                    |
| <b>6</b>  | +0.90            | +0.75            | +0.36            | +0.16            | -0.93            | -1.22            | 1.09                                    |
| <b>7</b>  | +0.85            | +0.72            | +0.30            | +0.08            | -1.00            | -1.25            | 1.07                                    |
| <b>8</b>  | +0.88            | +0.74            | +0.31            | +0.08            | -0.98            | -1.23            | 1.06                                    |
| <b>9</b>  | +0.86            | +0.72            | +0.30            | +0.08            | -0.97            | -1.22            | 1.05                                    |
| <b>10</b> | +0.89            | +0.75            | +0.32            | +0.07            | -0.98            | -1.24            | 1.05                                    |
| <b>11</b> | +0.86            | +0.73            | +0.29            | +0.04            | -1.00            | -1.25            | 1.04                                    |
| <b>12</b> | +0.86            | +0.76            | +0.27            | +0.04            | -0.96            | -1.24            | 1.00                                    |

[a]  $\Delta E_{1/2}^{\circ}$  is the potential difference between the first oxidation and the first reduction processes, i.e. the HOMO-LUMO gap of the complexes:  $\Delta E_{1/2}^{\circ} = \text{Oxd}_1 - \text{Red}_1$ .

**Table S5.** The effective imaginary third order molecular hyperpolarizability  $\text{Im}\{\chi^{(3)}\}$  value of the compounds **1-12** in toluene solution under an open-aperture configuration.

|                                                        |          |          |          |           |           |           |
|--------------------------------------------------------|----------|----------|----------|-----------|-----------|-----------|
| Compound                                               | <b>1</b> | <b>2</b> | <b>3</b> | <b>4</b>  | <b>5</b>  | <b>6</b>  |
| $\text{Im}\{\chi^{(3)}\}(\times 10^{-11} \text{ esu})$ | 24.1     | 21.5     | 21.4     | 21.4      | 22.4      | 22.5      |
| Compound                                               | <b>7</b> | <b>8</b> | <b>9</b> | <b>10</b> | <b>11</b> | <b>12</b> |
| $\text{Im}\{\chi^{(3)}\}(\times 10^{-11} \text{ esu})$ | 22.7     | 22.6     | 20.4     | 20.6      | 20.6      | 21.3      |
